# Supplementary material
Source: publisher site journal article supplement (https://e-cmh.org/upload/media/cmh-2020-0307-suppl5.pdf)
Supplement: Supplementary file 1 [file cmh-2020-0307-suppl5.pdf]

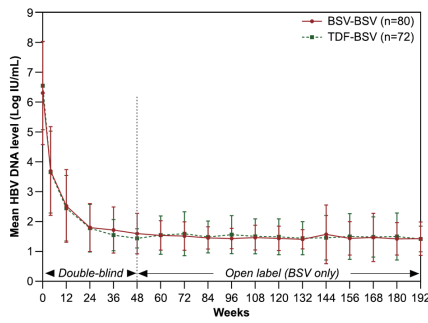

**A. Mean DNA (Log IU/ml)**

| Week                                      | 0     | 24    | 48    | 72    | 96    | 120   | 144   | 168   | 192   |
|-------------------------------------------|-------|-------|-------|-------|-------|-------|-------|-------|-------|
| BSV-BSV                                   | 6.31  | 1.80  | 1.60  | 1.52  | 1.44  | 1.44  | 1.57  | 1.47  | 1.43  |
| TDF-BSV                                   | 6.55  | 1.78  | 1.44  | 1.60  | 1.56  | 1.49  | 1.46  | 1.49  | 1.42  |
| <i>P</i> -value (t-test)                  | 0.354 | 0.851 | 0.061 | 0.421 | 0.135 | 0.538 | 0.432 | 0.908 | 0.850 |
| <i>P</i> -value (repeated measures ANOVA) | 0.913 |       |       |       |       |       |       |       |       |

**A**

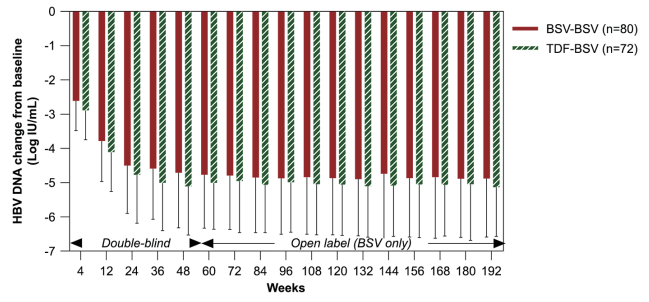

**B. DNA change (Log IU/ml)**

| Week                                      | 24    | 48    | 72    | 96    | 120   | 144   | 168   | 192   |
|-------------------------------------------|-------|-------|-------|-------|-------|-------|-------|-------|
| BSV-BSV                                   | -4.5  | -4.71 | -4.79 | -4.87 | -4.87 | -4.74 | -4.84 | -4.88 |
| TDF-BSV                                   | -4.77 | -5.11 | -4.96 | -4.99 | -5.06 | -5.09 | -5.07 | -5.14 |
| <i>P</i> -value (t-test)                  | 0.242 | 0.103 | 0.519 | 0.645 | 0.454 | 0.206 | 0.393 | 0.316 |
| <i>P</i> -value (repeated measures ANOVA) | 0.283 |       |       |       |       |       |       |       |

**B**

**Supplementary Figure 1.** (A) Mean HBV DNA level (log IU/mL). (B) HBV DNA change from baseline (log IU/mL). BSV, besifovir dipivoxil maleate; TDF, tenofovir disoproxil fumarate; HBV, hepatitis B virus; ANOVA, analysis of variance.
